# Supplementary material
Source: Royal Society of Chemistry journal article supplement (https://www.rsc.org/suppdata/dt/1999/2183/901962f.doc)
Supplement: Supplementary file 1 [file 901962f.doc]

Contribution from Dr. Russell E. Morris

School of Chemistry

University of St. Andrews

St. Andrews

Fife

KY16 9ST

Tel: (01334) 463818

Fax (01334) 463808

#### E-mail rem1@st-and.ac.uk

# Synthesis and characterisation of silanol-functionalised dendrimers

**Pamela I. Coupar, Paul-Alain Jaffrès and Russell E. Morris***

*School of Chemistry, University of St. Andrews, St. Andrews, Fife, UK KY16 9ST*

|  | Careful hydrolysis of the Si-Cl groups of dendrimers produces molecules derivatised with silanol groups on their external surfaces. |
| --- | --- |

## SUPPLEMENTARY MATERIAL

**Synthetic Procedures for Compounds 1-12**

**tetrakis[2-(dimethylhydroxysilyl)ethyl]silane 1**

• From tetrakis[2-(chlorodimethylsilyl)ethyl]silane : a solution of tetrakis[2-(chlorodimethyl)ethyl]silane (reference 12, 3.82 g, 7.3 mmol) in diethyl ether (50 ml) was added dropwise to a mixture of aniline (2.79 g, 30 mmol) and water (0.54 g, 30 mmol) in diethyl ether (100 ml). The solution was stirred at room temperature overnight. Diethyl ether (50 ml) was added and the anilinium salt was removed by filtration. The filtrate was concentrated *in vacuo* and the residue was crystallised from diethyl ether / hexane. Compound **1** was obtained by filtration as a white solid (2.07 g, 64 %).

• From tetrakis[2-(dimethylsilyl)ethyl]silane : a solution of tetrakis[2-(dimethyl)ethyl]silane (compound **7**, 0.3 g, 0.79 mmol) in 1,4-dioxane (15 ml) was added dropwise to a suspension of 5 % palladium on charcoal (0.1 g) in a mixture of dioxane (5 ml) and buffer solution (0.5 ml). After the addition the solution was stirred at room temperature overnight. The solution was filtered on celite (THF as eluent) and the filtrate was concentrated *in vacuo*. The residue (0.34 g) was crystallised from diethyl ether / hexane affording compound **1** as a white solid (0.32 g, 91 %).

m.p. 129 °C; Microanalysis found C, 44.11 ; H, 10.43 ; C16H44O4Si5 requires C, 43.58 ; H, 10.06;1H(CD3OD), 0.27 (s, Si-C**H**3, 48 H), 0.70 (m, C**H**2, 32 H), 5.07 (s, -O**H**, 8 H); 13C(CD3OD), -0.84 (Si-**C**H3), 3.38 (-**C**H2-), 11.06 (-**C**H2-); I.R. (KBr, disk), 3270 (vs), 2959 (m), 2910 (m), 1407 (m), 1250 (s), 1127 (s), 1068 (m), 868 (vs),764 (s)

**tris[2-(dimethylhydroxysilyl)ethyl]methylsilane 2**

A solution of tris[2-(chlorodimethylsilyl)ethyl]methylsilane (4.64 g, 11 mmol) in diethyl ether (110 ml) was added dropwise to a mixture of aniline (3.26 g, 35 mmol) and water (0.63 g, 35 mmol) in diethyl ether (100 ml). The solution was stirred at room temperature overnight. Diethyl ether (50 ml) was added and the anilinium salt was removed by filtration. The filtrate was concentrated *in vacuo* and the residue was crystallised from THF / hexane to give compound **2** as a white solid (2.56 g, 66 %).1H(CD3OD), 0.14 (s, Si-C**H**3, 3 H), 0.27 (s, Si-C**H**3, 16 H), 0.66 (m, C**H**2, 12 H), 5.06 (s, -O**H**, 3 H); 13C(CD3OD), -4.94 (Si-**C**H3), 0.42 (Si-**C**H3), 6.44 (-**C**H2-), 12.24 (-**C**H2-);

**2,4,6,8 –tetramethyl, 2,4,6,8,-tetrakis[2-(dimethylhydroxysilyl)ethyl) tetracyclosiloxane** **3**

Dendrimer **9** (0.3g), in dioxane (10ml) was added dropwise to a stirring suspension of Pd/C (0.1g) in dioxane (5ml) with buffer solution (0.4ml). The top of the reflux condenser was fitted to a gas collector filled with water and arranged so that the displaced water could be measured. 45ml of water had been displaced. The mixture was filtered through celite, washed with diethyl ether and the volatiles were removed on the rotary evaporator. A colourless oil was produced and this was dissolved in diethyl ether and had hexane added to it to crystallise the product in the freezer. 13C NMR (CD3OD) referenced to TMS -3.25 (m, CH3), -1.1 (m, CH3), 9.53 (s, CH2), 10.02 (s, CH2). 1H NMR 0.25 (s, CH3), 0.27-0.28 (d, CH3), 0.66-0.73 (m, CH2). CHN analysis gave %C 37.18 : %H 8.75, whereas the theoretical yielded %C 36.99 : %H 8.69.

**tetrakis{2-[tris-(2-(dimethylhydroxysilyl)ethyl)silyl]ethyl}silane 4**

A solution of tetrakis{2-[tris-(2-(dimethylsilyl)ethyl)silyl]ethyl}silane (0.3 g, 0.23 mmol) in 1,4-dioxane (10 ml) was added dropwise to a suspention of 5 % palladium on charcoal (0.08 g) in a mixture of dioxane (5 ml) and buffer solution (0.4 ml). After the addition the solution was stirred at room temperature overnight. The solution was filtered on celite (THF as eluent) and the filtrate was concentrated *in vacuo* affording compound **4** as a viscous oil (0.32 g, 94 %).1H(CD3OD), 0.28 (s, Si-C**H**3, 72 H), 0.64 - 0.75 (m, Si-C**H**2-C**H**2-Si-C**H**2-C**H**2-Si, 64 H), 5.05 (m, Si-O**H**, 12 H); 13C(CD3OD), 0.78 (Si-**C**H3), 4.66 (-**C**H2-), 5.30 (-**C**H2-), 5.83 (-**C**H2-), 12.53 (-**C**H2-);

**1,3,5,7,9,11,13,15-octakis{2-[dimethylhydroxysilyl]ethyl}pentacyclo[9.5.1.13,9.15,15.17,13]octasiloxane 5**

A solution of 1,3,5,7,9,11,13,15-octakis{2-[dimethylsilyl]ethyl}pentacyclo[9.5.1.13,9.15,15.17,13]-octasiloxane (0.36 g, 0.32 mmol) in 1,4-dioxane (25 ml) was added dropwise to a suspention of 10 % palladium on charcoal (0.1 g) in a mixture of dioxane (5 ml) and a buffer solution (0.7 ml). After the addition the solution was stirred at room temperature overnight. The solution was filtered on celite (THF as eluent) and the filtrate was concentrated *in vacuo*. The viscous oil (0.48 g) was crystallised from ethyl acetate to give compound **5** as white solid (0.26 g, 65 %).Microanalysis found C, 30.79 ; H, 6.89 ; C32H88O20Si16 requires C, 30.93 ; H, 7.14;1H(CD3OD), 0.29 (s br, Si-C**H**3, 48 H), 0.81 (m, C**H**2, 32 H), 5.08 (s, -O**H**, 8 H); 13C(CD3OD), - 1.61 (Si-**C**H3), 6.09 (-**C**H2-), 9.70 (-**C**H2-); I.R. (KBr, disk), 3316 (vs), 2958 (m), 2895 (m), 1408 (m), 1253 (s), 1143 (vs), 868 (s),757 (m), 632 (m), 536 (m), 470 (m)

**1,3,5,7,9,11,13,15-octakis{2-(bis-[2-(dimethylhydroxysilyl)ethyl]methylsilyl)ethyl}pentacyclo[9.5.1.13,9.15,15.17,13]octasiloxane 6**

A solution of compound **12** (0.49 g, 0.20 mmol) in 1,4-dioxane (30 ml) was added dropwise to a suspension of 5 % palladium on charcoal (0.2 g) in a mixture of dioxane (5 ml) and buffer solution (1.4 ml). After the addition the solution was stirred at room temperature overnight (65 ml of H2 were produced). The solution was filtered on celite (THF as eluent) and the filtrate was concentrated *in vacuo* affording compound **6** as a viscous oil (0.52 g, 96 %).1H(CD3OD), 0.25 (s, Si-C**H**3, 24 H), 0.28 (s, Si-C**H**3, 96 H), 0.60 - 0.70 (m, C**H**2, 96 H), 5.08 (s, Si-O**H**, 16 H); 13C(CD3OD), 0.78 (Si-**C**H3), 1.40 (Si-**C**H3), 6.51 (-**C**H2-), 6.77 (-**C**H2-), 7.02 (-**C**H2-), 12.31 (-**C**H2-);

**tetrakis[2-(dimethylsilyl)ethyl]silane 7**

A solution of tetrakis[2-(chlorodimethylsilyl)ethyl]silane (3.68 g, 7.3 mmol) in diethyl ether (60 ml) was added dropwise to a suspension of LiAlH4 (0.56 g, 15 mmol) in diethyl ether (40 ml). After additionnal stirring at room temperature for 15 h the solution was filtered on celite. The filtrate was cautiously added to a mixture of hydrogen chloride (1M in water, 100 ml) and ice. Hydrogen chloride (1M in water, 50 ml) was cautiously added. The organic layer was washed with brine (2 x 40 ml), dried over MgSO4 and concentrated. The residue (3.12 g) was loaded on a column of silica gel and eluted with petroleum ether to yield compound **7** as colourless oil (2.26 g, 82 %). 1H(CDCl3), 0.10 (d, 3JHH = 3.6 Hz, Si-C**H**3, 24 H), 0.50 (m, -C**H**2-C**H**2-, 16 H), 3.87 (m, Si-**H**, 4 H); 13C(CDCl3), -4.60 (Si-**C**H3), 3.63 (-**C**H2-), 6.42 (-**C**H2-); I.R. (NaCl), 2957 (s), 2109 (vs, Si-H), 1407 (m), 1249 (s), 1132 (s), 1084 (s), 883 (vs)

**2,4,6,8 –tetramethyl, 2,4,6,8,-tetrakis[2-(dimethylsilyl)ethyl) tetracyclosiloxane** **9**

To a stirring solution of LiAlH4 (0.57g) in dry diethyl ether (50ml) a solution of the 2,4,6,8 –tetamethyl, 2,4,6,8,-tetrakis[2-(dimethylchlorosilyl)ethyl) tetracyclosiloxane in dry diethyl ether (50ml) was added dropwise under argon. The resulting mixture was allowed to stir overnight. The resulting mixture was added to an ice-cooled 2N HCl (36ml) aqueous solution. The aqueous layer was extracted with diethyl ether and the combined organic layers were washed twice with water and once with saturated NaCl aqueous solution before drying over MgSO4. The resulting mixture was filtered through celite and the volatiles were removed on the rotary evaporator. Yield 3.59g (65%). 1H 3.8-3.9 (m, Si**H**, 1H),0.4-0.6 (m, C**H**2, 4H), 0-0.1 (m, C**H**3). 13C NMR 75.4MHz 9.764 (m, **C**H2), 5.466 (m, **C**H2), -1.557 (m, **C**H3), -4.968 (m, **C**H3). Infra red spectroscopy showed a large peak at 2045cm-1 for SiH stretch. CHN microanalysis yielded %C 40.96 : %H 9.7, theoretical results were %C 41.03 : %H 9.64.

**tetrakis{2-[tris-(2-(dimethylsilyl)ethyl)silyl]ethyl}silane 10**

A solution of tetrakis{2-(tris[2-(chlorodimethylsilyl)ethyl]silyl)ethyl]silane (2.96 g, 1.73 mmol) in diethyl ether (30 ml) was added dropwise to a suspension of LiAlH4 (0.40 g, 10 mmol) in diethyl ether (50 ml). After additional stirring at room temperature for 15 h, hydrogen chloride (1M in water, 50 ml) was cautiously added. Diethyl ether was added (40 ml) and the organic layer was washed with brine (2 x 40 ml), dried over MgSO4 and concentrated. The residue was loaded on a column of silica gel and eluted with hexane to yield compound **10** as a low melting point solid (1.52 g, 68 %). m.p. 49 °C; 1H(CDCl3), 0.08 (d, 3JHH = 3.6 Hz, Si-C**H**3, 72 H), 0.49 (m, Si-C**H**2-C**H**2-Si-C**H**2-C**H**2-Si, 64 H), 3.86 (m, Si-**H**, 12 H); 13C(CDCl3), -4.77 (Si-**C**H3), 5.06 (-**C**H2-), 5.68 (-**C**H2-); I.R. (NaCl), 2957 (s), 2906 (s), 2109 (vs, Si-H), 1407 (m), 1250 (s), 1132 (s), 1057 (s), 892 (vs), 736 (s)

**1,3,5,7,9,11,13,15-octakis{2-[dimethylsilyl]ethyl}pentacyclo[9.5.1.13,9.15,15.17,13]octasiloxane 11**

A solution of 1,3,5,7,9,11,13,15-octakis{2-[chlorodimethylsilyl]ethyl}pentacyclo-[9.5.1.13,9.15,15.17,13]octasiloxane (See reference 13) (2.20 g, 1.58 mmol) in diethyl ether (100 ml) was added dropwise to a suspension of LiAlH4 (0.26 g, 6.8 mmol) in diethyl ether (80 ml). After additionnal stirring at room temperature for 15 h the solution was filtered on celite. The filtrate was cautiously added to a mixture of hydrogen chloride (1M in water, 100 ml) and ice. The organic layer was washed with brine (2 x 40 ml), dried over MgSO4 and concentrated. The residue (1.74 g) was recrystallised from acetone/ethanol affording compound **11** as a white solid (1.07 g, 61%). m.p. 147 °C; Microanalysis found C, 34.09 ; H, 8.21 ; C32H88O12Si16 requires C, 34.49 ; H, 7.96; 1H(CDCl3), 0.09 (d, 3JHH = 3.6 Hz, Si-C**H**3, 48 H), 0.63 (m, C**H**2, 32 H), 3.87 (m, Si-**H**, 8 H); 13C(CDCl3), -4.80 (Si-**C**H3), 5.06 (-**C**H2-), 5.68 (-**C**H2-); I.R. (KBr, disk), 2959 (m), 2923 (m), 2111 (vs, Si-H), 1407 (m), 1250 (s), 1145 (s), 1111 (vs), 888 (s), 836 (m), 806 (m), 720 (m), 625 (m), 545 (m), 470 (m)

**1,3,5,7,9,11,13,15-octakis{2-(bis-[2-(dimethylsilyl)ethyl]methylsilyl)ethyl}-pentacyclo[9.5.1.13,9.15,15.17,13]octasiloxane 12**

A solution of 1,3,5,7,9,11,13,15-octakis{2-(bis-[2-(chlorodimethylsilyl)ethyl]methylsilyl)ethyl}-pentacyclo[9.5.1.13,9.15,15.17,13]octasiloxane (see ref. 13) (1.51 g, 0.51 mmol) in diethyl ether (40 ml) was added dropwise to a suspension of LiAlH4 (0.16 g, 4.1 mmol) in diethyl ether (20 ml). After additional stirring at room temperature for 15 h the solution was filtered on celite. The filtrate was cautiously added to a mixture of hydrogen chloride (1M in water, 50 ml) and ice. The organic layer was washed with brine (2 x 40 ml), dried over MgSO4 and concentrated. The residue (1.16 g) was loaded on a column of silica gel and eluted with hexane to yield compound **12** as colourless oil (0.49 g, 40 %). 1H(CDCl3), - 0.04 (s, Si-C**H**3, 24 H), 0.08 (d, 3JHH = 3.6 Hz, Si-C**H**3, 96 H), 0.45 - 0.50 (m, C**H**2, 96 H), 3.85 (m, Si-**H**, 16 H); 13C(CDCl3), - 6.46 (Si-**C**H3), -4.77 (Si-**C**H3), 4.25 (-**C**H2-), 4.53 (-**C**H2-), 5.33 (-**C**H2-), 6.33 (-**C**H2-);

**Crystal Structure Determination of Compound 1**

Single crystal X-ray diffraction data for compound **1**, (recrystallised from 50/50 diethyl ether/ hexane mixture, crystal size 0.4 × 0.4 × 0.1 mm), were collected on a Rigaku AFC7S four circle diffractometer employing MoK radiation at 220K. The molecule crystallises in spacegroup P21/n (No. 14) with lattice parameters *a* = 10.00 (2) Å, *b* = 15.94 (2) Å, *c* = 17.49 (1) Å and  = 92.4 (1) , Volume = 2785 (7) Å3. The diffraction from the crystal was relatively weak and the reflections were rather irregularly shaped and this presumably accounts for the rather poor precision on the final unit cell refinement. The crystal showed almost no diffraction above 40o 2, but the final least-squares refinement against F was successfully completed with final agreement factors of R(F) = 0.038, Rw(F) of 0.047 and g.o.f. of 2.4 were obtained for a full-matrix least-squares refinement against 2016 unique reflections, of which 1521 were observed according to the criterion that I > 3(I). The silicon, carbon and atoms were refined with anisotropic thermal displacement parameters. The hydrogen atoms on the methylene units of the dendrimer arms were placed in geometrically reasonable positions.
